# Supplementary material for: ESBL-Type and AmpC-Type Beta-Lactamases in Third Generation Cephalosporin-Resistant Enterobacterales Isolated from Animal Feces in Madagascar
Source: MDPI journal article supplement (doi:10.3390/ani14050741), 2024-02-27
Supplement: s1 [file s1]

**Supplementary Table S1:** Details on the sampling dates and exact locations of the swabbing of the stool droppings.

| Sample I.D. | Animal species                  | Sampling date<br>(year-month-day) | latitude    | longitude  |
|-------------|---------------------------------|-----------------------------------|-------------|------------|
| ET01        | <i>Echinops telfairi</i>        | 2017-03-10                        | -24.032913  | 43.721908  |
| HC35        | <i>Macronycteris commersoni</i> | 2017-03-04                        | -24.045841  | 43.753921  |
| HC36        | <i>Macronycteris commersoni</i> | 2017-03-04                        | -24.045841  | 43.753921  |
| HC37        | <i>Macronycteris commersoni</i> | 2017-03-06                        | -24.045841  | 43.753921  |
| HC38        | <i>Macronycteris commersoni</i> | 2017-03-06                        | -24.045841  | 43.753921  |
| HC39        | <i>Macronycteris commersoni</i> | 2017-03-08                        | -24.045841  | 43.753921  |
| HC40        | <i>Macronycteris commersoni</i> | 2017-03-08                        | -24.045841  | 43.753921  |
| MG11r       | <i>Microcebus griseorufus</i>   | 2017-02-23                        | -24.024776  | 43.736216  |
| MG16r       | <i>Microcebus griseorufus</i>   | 2017-04-06                        | -24.028973  | 43.739648  |
| MG23r       | <i>Microcebus griseorufus</i>   | 2017-03-08                        | -24.033346  | 43.721355  |
| MG59        | <i>Microcebus griseorufus</i>   | 2017-02-10                        | -24.022742  | 43.728882  |
| MG60        | <i>Microcebus griseorufus</i>   | 2017-02-10                        | -24.017216  | 43.728793  |
| MG61        | <i>Microcebus griseorufus</i>   | 2017-02-10                        | -24.016828  | 43.728565  |
| MG62        | <i>Microcebus griseorufus</i>   | 2017-02-10                        | -24.016622  | 43.728481  |
| MG63        | <i>Microcebus griseorufus</i>   | 2017-02-10                        | -24.016752  | 43.728757  |
| MG64        | <i>Microcebus griseorufus</i>   | 2017-02-10                        | -24.016844  | 43.728701  |
| MG65        | <i>Microcebus griseorufus</i>   | 2017-02-11                        | -24.02291   | 43.729003  |
| MG66        | <i>Microcebus griseorufus</i>   | 2017-02-11                        | -24.022742  | 43.728882  |
| MG67        | <i>Microcebus griseorufus</i>   | 2017-02-11                        | -24.022189  | 43.72875   |
| MG68        | <i>Microcebus griseorufus</i>   | 2017-02-11                        | -24.021337  | 43.728384  |
| MG70        | <i>Microcebus griseorufus</i>   | 2017-02-11                        | -24.016715  | 43.728496  |
| MG71        | <i>Microcebus griseorufus</i>   | 2017-02-12                        | -24.022189  | 43.72875   |
| MG74        | <i>Microcebus griseorufus</i>   | 2017-03-08                        | -24.030371  | 43.724834  |
| MG75        | <i>Microcebus griseorufus</i>   | 2017-03-08                        | -24.030181  | 43.72336   |
| MG76        | <i>Microcebus griseorufus</i>   | 2017-03-08                        | -24.030392  | 43.721891  |
| MG77        | <i>Microcebus griseorufus</i>   | 2017-03-09                        | -24.033346  | 43.721355  |
| MG79        | <i>Microcebus griseorufus</i>   | 2017-03-09                        | -24.030099  | 43.723119  |
| MG84        | <i>Microcebus griseorufus</i>   | 2017-03-22                        | -24.026611  | 43.737068  |
| MG86        | <i>Microcebus griseorufus</i>   | 2017-03-27                        | -24.026611  | 43.737068  |
| MG87        | <i>Microcebus griseorufus</i>   | 2017-03-27                        | -24.037652  | 43.742995  |
| MG88        | <i>Microcebus griseorufus</i>   | 2017-03-27                        | -24.046558  | 43.699368  |
| MG89        | <i>Microcebus griseorufus</i>   | 2017-03-28                        | -24.034932  | 43.742667  |
| MG90        | <i>Microcebus griseorufus</i>   | 2017-04-04                        | -24.027832  | 43.738939  |
| MG91        | <i>Microcebus griseorufus</i>   | 2017-04-04                        | -24.028227  | 43.739164  |
| MG92        | <i>Microcebus griseorufus</i>   | 2017-04-04                        | -24.032257  | 43.741946  |
| MG93        | <i>Microcebus griseorufus</i>   | 2017-04-05                        | -24.028973  | 43.739648  |
| MG94        | <i>Microcebus griseorufus</i>   | 2017-04-05                        | -24.030024  | 43.740874  |
| MG95        | <i>Microcebus griseorufus</i>   | 2017-04-07                        | -24.025434  | 43.738611  |
| MG96        | <i>Microcebus griseorufus</i>   | 2017-04-07                        | -24.026568  | 43.738496  |
| PA64        | <i>Pyxis arachnoides</i>        | 2017-03-23                        | -24.027612  | 43.706747  |
| RR25        | <i>Rattus rattus</i>            | 2017-02-28                        | -24.078624  | 43.6997831 |
| RR26        | <i>Rattus rattus</i>            | 2017-03-11                        | -24.026611  | 43.737068  |
| RR27        | <i>Rattus rattus</i>            | 2017-03-12                        | -24.0427134 | 43.6947647 |
| RR28        | <i>Rattus rattus</i>            | 2017-03-15                        | -24.079488  | 43.674248  |
| RR29        | <i>Rattus rattus</i>            | 2017-03-23                        | -24.024521  | 43.710638  |
| RR30        | <i>Rattus rattus</i>            | 2017-04-05                        | -24.033092  | 43.739572  |
| SS01        | <i>Setifer setosus</i>          | 2017-03-08                        | -24.032369  | 43.723176  |
| SS02        | <i>Setifer setosus</i>          | 2017-03-14                        | -24.080277  | 43.674158  |
| TM110       | <i>Triaenops menamena</i>       | 2017-03-03                        | -24.045841  | 43.753921  |

I.D. = identity.
